# Supplementary material for: The adapted Autonomic Profile (aAP) Home-Based Test for the Evaluation of Neuro-Cardiovascular Autonomic Dysfunction
Source: Preprints.org preprint supplement (doi:10.20944/preprints202206.0325.v3), 2022-07-28
Supplement: Supplementary file 2 [file supplementary]

**The adapted BP/HR Autonomic profile (aAP) diary sheet**

**Participant Initials Date**

* **Food and fluid intake** – please briefly state what food or drink, including alcohol, was consumed. For e.g, 08:00 water, muesli, yougurt

* **Activity** (can be physical, cognitive or emotional) – please state the activity and for how long. For e.g., 09:00 washing dishes and cleaning kitchen for 10 min

| **Enter time**  **e.g., 08:00** | **Position/Activity** | **Blood Pressure**  **e.g., 120/80** | **Heart**  **Rate**  **e.g., 76** | **Symptoms**  **e.g, felt dizzy, headache, etc.** |
| --- | --- | --- | --- | --- |
| **EARLY MORNING (ON WAKING)** Enter time: | | | | |
|  | Lying |  |  |  |
|  | After 3 min sitting |  |  |  |
|  | After 3 min standing |  |  |  |
| **BREAKFAST**  Time: Details of food and fluid*: | | | | |
|  | Lying |  |  |  |
|  | After 3 min standing |  |  |  |
| **ACTIVITY/ EXERTION** Time: Details of activity*: | | | | |
|  | Before exertion |  |  |  |
|  | After 3 min exertion |  |  |  |
| **LUNCH**  Time: Details of food and fluid*: | | | | |
|  | Lying |  |  |  |
|  | After 3 min standing |  |  |  |
| **ACTIVITY**  Time: Details of activity*: | | | | |
|  | Before exertion |  |  |  |
|  | After 3 min exertion |  |  |  |
| **Enter time**  **e.g., 08:00** | **Position/Activity** | **Blood Pressure**  **e.g., 120/80** | **Heart**  **Rate**  **e.g., 76** | **Symptoms**  **e.g, felt dizzy, headache, etc.** |
| **DINNER**  Time: Details of food and fluid*: | | | | |
|  | Lying |  |  |  |
|  | After 3 min standing |  |  |  |
| **BEFORE SLEEPING (IN BED)** | | | | |
|  | Lying in usual sleeping position (as with pillows) |  |  |  |

**Note: Measure sitting BP/HR if you find it difficult to stand.**

**Please record any other type of activity that you would like to tell us about and is not listed above, with time & position.**

| **Enter time**  **e.g., 08:00** | **Position/Activity** | **Blood Pressure**  **e.g., 120/80** | **Heart**  **Rate**  **e.g., 76** | **Symptoms**  **e.g, felt dizzy, headache, etc.** |
| --- | --- | --- | --- | --- |
|  |  |  |  |  |
|  |  |  |  |  |
